# Supplementary material for: Coke and sintering resistant nickel atomically doped with ceria nanosheets for highly efficient solar driven hydrogen production from bioethanol
Source: Royal Society of Chemistry journal article supplement (doi:10.1039/d1gc03955e), 2022-01-01
Supplement: d1gc03955e1.pdf [file d1gc03955e1.pdf]

## Coke and Sintering Resistant Nickel Atomically Doped Ceria Nanosheets for Highly Efficient Solar Driven Hydrogen Production from Bioethanol

Dachao Yuan,<sup>‡\*a</sup> Yahang Peng,<sup>‡a</sup> Luping Ma,<sup>‡a</sup> Jianchang Li,<sup>a</sup> Jianguo Zhao,<sup>a</sup> Jianjun Hao,<sup>\*a</sup> Shufang Wang,<sup>a,b</sup> Baolai Liang,<sup>b</sup> Jinhua Ye,<sup>c</sup> Yaguang Li<sup>\*a,b</sup>

---

<sup>a</sup> College of Mechanical and Electrical Engineering, Key Laboratory Intelligent Equipment and New Energy Utilization of Livestock and Poultry Breeding, Hebei Agricultural University, Baoding 071001, China. E-mail: [jdydch@hebau.edu.cn](mailto:jdydch@hebau.edu.cn), [hjppaper@163.com](mailto:hjppaper@163.com).

<sup>b</sup> Hebei Key Lab of Optic-electronic Information and Materials, The College of Physics Science and Technology, Institute of Life Science and Green Development, Hebei University, Baoding, 071002, China. E-mail: [liyaguang@hbu.edu.cn](mailto:liyaguang@hbu.edu.cn).

<sup>c</sup> International Center for Materials Nanoarchitectonics (WPI-MANA), National Institute for Materials Science (NIMS), 1-1 Namiki, Tsukuba, Ibaraki 305-0044, Japan.

Electronic Supplementary Information (ESI) available: details of any supplementary information available should be included here. See DOI: 10.1039/x0xx00000x

<sup>‡</sup>These authors contributed equally.

## Experimental Section

### Chemicals

$\text{Ni}(\text{NO}_3)_2 \cdot 6\text{H}_2\text{O}$ ,  $\text{HNO}_3$ ,  $\text{C}_2\text{H}_8\text{N}_2$  and  $\text{NH}_3 \cdot \text{H}_2\text{O}$  were purchased from Tianjin Damao Chemical Reagent Co., Ltd.,  $\text{Ce}(\text{NO}_3)_3 \cdot 6\text{H}_2\text{O}$  were purchased from Tianjin Kermel Chemical Reagent Co., Ltd., Citric acid was purchased from Tianjin Beichen Founder Reagent Factory, ethanol was purchased from Beilian chemical industry Co., Ltd. All chemicals were directly used without further treatment. The mixture of water and bioethanol used for ESR was in the ratio of 13:1, which was referred to the ratio of corn fermentation broth.

### Catalysts preparation

#### Ni SA/CeO<sub>2</sub>

The Ni SA/CeO<sub>2</sub> was prepared by followed procedures. Firstly, 5 g citric acid was measured as the complexing agent, 0.2 g  $\text{Ni}(\text{NO}_3)_2 \cdot 6\text{H}_2\text{O}$  and 2 g  $\text{Ce}(\text{NO}_3)_3 \cdot 6\text{H}_2\text{O}$  were all dissolved in 10 mL of deionized water and stirred for 10 min. Then, 2.5 mL nitric acid and 1 mL ethylenediamine were added as the viscosity agent. After fully stirring, ammonia was added to adjust the pH value to about 6. Subsequently, the solution was stirred and dried at 80 °C, and then moved to a 100 °C constant temperature drying oven for 24 h. The product was calcined in argon at 400 °C for 3 h to get the expanded solid and then calcinated in the air at 400 °C for 4 h to prepare the Ni SA/CeO<sub>2</sub> (the Ni/Ce atomic ratios were 0.15).

#### Ni P/CeO<sub>2</sub>

The synthesis of Ni P/CeO<sub>2</sub> was similar to that of Ni SA/CeO<sub>2</sub> and the only difference was that the mass of  $\text{Ni}(\text{NO}_3)_2 \cdot 6\text{H}_2\text{O}$  was 0.5 g. By varying the amount of Ni, the Ni/Ce atomic ratio was tuned to 0.375. To increase the ESR activity, the Ni P/CeO<sub>2</sub> nanosheets were annealed under 10% H<sub>2</sub>/Ar at 400 °C for 3 h (Figure S8).

We used ICP-AES to test the actual atomic ratio of Ni in Ni SA/CeO<sub>2</sub> and Ni P/CeO<sub>2</sub>. The Ni/Ce ratio was estimated to be 15.03 at.%, 37.45 at.% in Ni SA/CeO<sub>2</sub> and Ni P/CeO<sub>2</sub>, respectively.

## CeO<sub>2</sub>

The synthesis of CeO<sub>2</sub> nanosheets was similar to that of Ni SA/CeO<sub>2</sub> and the only difference was the absence of Ni(NO<sub>3</sub>)<sub>2</sub>·6H<sub>2</sub>O.

### Thermal catalytic test

The thermal ESR catalytic activity of catalysts was tested by the fixed-bed reactor (XM190708-007, DALIAN ZHONGJIARUILIN LIQUID TECHNOLOGY CO., LTD) in continuous flow form. Typically, 10 mg catalyst was placed in a quartz flow reactor. 50 sccm Ar was regulated by a mass flow controller and the steam generated by the raw water and ethanol (molar ratio of 13:1) heated in a water bath at 80 °C was introduced into the reaction system to start the reaction. The product first passed through a condenser to condense the unreacted ethanol and water, and then the gas entered a gas chromatograph (GC) 7890A for analysis. In the gas chromatograph, the gas first passed through the TCD detector to detect H<sub>2</sub>, and then passed through the FID detector to detect CO, CH<sub>4</sub> and CO<sub>2</sub>.

The TOF calculation was as follows:

$$\text{TOF}_{\text{Ni SA/CeO}_2} (\text{h}^{-1}) = (\text{Q}_{\text{Ni SA/CeO}_2} - \text{Q}_{\text{CeO}_2}) / \text{M}_{\text{Ni SA/CeO}_2} \quad (1)$$

$$\text{TOF}_{\text{Ni P/CeO}_2} (\text{h}^{-1}) = (\text{Q}_{\text{Ni P/CeO}_2} - \text{Q}_{\text{CeO}_2}) / \text{M}_{\text{Ni P/CeO}_2} \quad (2)$$

$\text{Q}_{\text{Ni SA/CeO}_2}$ ,  $\text{Q}_{\text{Ni P/CeO}_2}$ ,  $\text{Q}_{\text{CeO}_2}$  was the ESR hydrogen flow rate (mol h<sup>-1</sup>) of Ni SA/CeO<sub>2</sub>, Ni P/CeO<sub>2</sub>, CeO<sub>2</sub>, respectively.  $\text{M}_{\text{Ni SA/CeO}_2}$ ,  $\text{M}_{\text{Ni P/CeO}_2}$  was the molar amount of Ni in Ni SA/CeO<sub>2</sub>, Ni P/CeO<sub>2</sub>, respectively.

### Sunlight driven ESR

The laboratory light source we used for the test was a customized product (HP-2-4000, provided by Hebei scientist research experimental and equipment trade Co., Ltd.). 3 g of catalysts were loaded in the solar heating device (irradiation area ~500 cm<sup>2</sup>) irradiated by HP-2-4000. A raw material containing water and bioethanol (molar ratio of 13:1) was pumped into the system. A flowmeter (MV-192-H2, Bronkhorst) was used to measure the flow rate of

produced gases. The outlet gases were tested by gas chromatograph (GC) 7890A equipped with FID and TCD detectors.

The solar heating device was similar to that in our previous report,<sup>1</sup> except that the selective light absorber was changed by Ti<sub>2</sub>O<sub>3</sub> and the Al film was replaced by Cu film.

The hydrogen generation rate of the catalyst ( $\delta$ , mmol g<sup>-1</sup> h<sup>-1</sup>) from the solar heating system was calculated as follows:

$$\delta \text{ (mmol g}^{-1} \text{ h}^{-1}\text{)} = (1000 * L / 24.5) / G \quad (3)$$

L was the hydrogen flow rate (L h<sup>-1</sup>), G was the weight of catalysts (3 g).

### **Outdoor sunlight driven ESR**

The outdoor sunlight driven ESR was similar to the sunlight driven ESR. The only difference was that a parabolic reflector (with 0.5 m<sup>2</sup> of reflection area) was used to concentrate the sparse outdoor sunlight on the solar heating device. The install of the parabolic reflector was based on the ecliptic plane. The gases flow rate was tested by a flowmeter (C50 5SLM) and the outdoor sunlight driven ESR was operated from 10:00 to 14:00 on December 14, 2021, in Baoding, China.

### **Enthalpy change energy of chemicals**

The enthalpy change energy of ethanol (l), CO<sub>2</sub> (g), H<sub>2</sub> (g), H<sub>2</sub>O (l) was -276.981, -393.505, 0, -285.830 kJ mol<sup>-1</sup>, respectively.

The (g) and (l) indicated the gas state and liquid state, respectively.

### **STH calculation**

The STH efficiency of hydrogen generation from ESR was calculated as follows:

$$\text{STH} = (\Delta H * \varepsilon / 24.5) / (I * S * 3600) \quad (4)$$

$\Delta H$  was the reaction enthalpy change of ethanol dehydrogenation ( $1/6 \text{ C}_2\text{H}_5\text{OH (l)} + 1/2 \text{ H}_2\text{O (l)} \rightarrow \text{H}_2 \text{ (g)} + 1/3 \text{ CO}_2 \text{ (g)}$ ,  $\Delta H = 57.91 \text{ kJ mol}^{-1}$ ),  $\varepsilon$  (L) was the H<sub>2</sub> generation amount per hour detected by a flowmeter (MV-192-H2), I was the light intensity (kW m<sup>-2</sup>), S was the irradiated

area of catalysts ( $0.05 \text{ m}^2$ ). There was a small amount of CO and CH<sub>4</sub> that existed in the produced gas, which were ignored in this calculation, considering their small amount.

### **Characterizations**

The overall composition of the prepared samples was studied by the powder X-ray diffraction (XRD), which was performed on a Bede D1 system operated at 20 kV and 30 mA with Cu K $\alpha$  radiation ( $\lambda = 1.5406 \text{ \AA}$ ). ARM 200 F and JEOL F200+ were used to identify the morphology and the crystal structure of the nanostructures. Zennium\_Pro (Zahner, Germany) was an electrochemical workstation. N<sub>2</sub>-sorption isotherms were collected on a Belsorb-Max system. Brunauer-Emmett-Teller (BET) specific surface areas were calculated from the adsorption data. Platinum resistance thermometer (M363886) was used for detecting the data of temperatures. Thermo ESCALAB-250 spectrometer with a monochromatic Al K $\alpha$  radiation source (1486.6 eV) was used to detect the valence state of materials. Raman spectra were recorded on a HORIBA Raman spectrometer, with an excitation laser wavelength of 532 nm. The FTIR was tested by HYPERION 3000 (Bruker Optics). The thickness of catalysts was tested by AFM (MFP-3D Origin+, Oxford Instruments). The ICP-AES was tested by Thermo ICAP 6300 and the catalysts were dissolved by 4 M HNO<sub>3</sub> at 150 °C for 6 h.

### **EXAFS test and analysis.**

The Ni K-edge and Ce K-edge extended X-ray absorption fine structure (EXAFS) data were collected on the beamline at Shanghai Synchrotron Radiation Facility (SSRF). All samples were prepared by placing a small amount of homogenized (via agate mortar and pestle) powder on 3M tape. We used IFEFFIT software to calibrate the energy scale, correct the background signal and normalize the intensity. The spectra were normalized with respect to the edge height after subtracting the pre-edge and post-edge backgrounds using Athena software. To extract the EXAFS oscillations, the background was removed in k-space using a five-domain cubic spline. The resulting k-space data were then Fourier transformed.

## First principle calculation

The Vienna Ab Initio Package (VASP)<sup>2, 3</sup> has been used to conduct all the DFT calculations within the generalized gradient approximation (GGA) using the PBE formulation.<sup>4</sup> The projected augmented wave (PAW) potentials<sup>5, 6</sup> were chosen to describe the ionic cores and take valence electrons into account using a plane wave basis set with a kinetic energy cutoff of 400 eV. Partial occupancies of the Kohn–Sham orbitals were allowed using the Gaussian smearing method and a width of 0.05 eV. The electronic energy was considered self-consistent when the energy change was smaller than  $10^{-7}$  eV. Geometry optimization was considered convergent when the energy change was smaller than  $10^{-6}$  eV. Grimme’s DFT-D3 methodology<sup>7</sup> was used to describe the dispersion interactions among all the atoms in the bulk unit cells and surface models of interest.

The equilibrium lattice constant of face-centered cubic (FCC) Ni unit cell was optimized using a  $15 \times 15 \times 15$  Monkhorst-Pack k-point grid for Brillouin zone sampling, to be  $a=3.476$  Å. We then use it to construct a Ni (111) surface model with  $p(4 \times 3)$  periodicity in the x and y directions and 4 atomic layers in the z direction by vacuum depth of 15 Å in order to separate the surface slab from its periodic duplicates. This Ni (111) surface model contains 48 atoms. During structural optimizations, the gamma point in the Brillouin zone was used for k-point sampling, and the top two atomic layers were allowed to fully relax while the bottom two were fixed.

The equilibrium lattice constant of CaF<sub>2</sub>-type Ni SA/CeO<sub>2</sub> unit cell was optimized when using an  $11 \times 11 \times 11$  Monkhorst-Pack k-point grid for Brillouin zone sampling, to be  $a=5.479$  Å. We then use it to construct a CeO<sub>2</sub> (111) surface model with  $p(4 \times 3)$  periodicity in the x and y directions and 3 O-Ce-O tri-layers in the z direction by vacuum depth of 15 Å in order to separate the surface slab from its periodic duplicates. This CeO<sub>2</sub> (111) surface model contains 1 Ni, 35 Ce and 72 O atoms. During structural optimizations, the gamma point in the

Brillouin zone was used for k-point sampling, and the top one layer was allowed to fully relax while the bottom two were fixed.

### **Steam reforming test**

The CO, CH<sub>4</sub> steam reforming tests were tested by the fixed-bed reactor (XM190708-007, DALIAN ZHONGJIARUILIN LIQUID TECHNOLOGY CO., LTD.) in continuous flow form. Typically, 20 mg catalyst was placed in a quartz flow reactor. The feed gas composition for CO steam reforming was (vol.) 4 % CO and 6 % H<sub>2</sub>O balanced with Ar (the gas flow rate of CO+Ar is 100 sccm). The feed gas composition for CH<sub>4</sub> steam reforming was (vol.) 2 % CH<sub>4</sub> and 16 % H<sub>2</sub>O balanced with Ar (the gas flow rate of CH<sub>4</sub>+Ar is 100 sccm). The reaction products were tested by gas chromatograph (GC) 7890A equipped with FID and TCD detector.

### **The deposition of Ti<sub>2</sub>O<sub>3</sub> film and synthesis of devices**

The SP-0707AS magnetron sputtering was used to deposit Ti<sub>2</sub>O<sub>3</sub> film, which had the vacuum pressure lower than  $7.0 \times 10^{-3}$  Pa, and a 4 axis rotation system to rotate bases. Ti<sub>2</sub>O<sub>3</sub> and Cu were used as targets; the working gas was Ar with 99.99 % purity. The bases used in Figure 4b,c and Figure 4d,e,f were Cu film with 20×20×0.1 mm size and quartz reaction tube, respectively. Before the deposition process, the bases were washing with deionized water, acetone, ethanol subsequently.

1. The deposition of Ti<sub>2</sub>O<sub>3</sub> film on Cu film was first using glow-discharge to clean Cu film, then depositing the Ti<sub>2</sub>O<sub>3</sub> film, finally taking out the sample after passive cooling. Specific parameters: the power was 5 KW, the sputtering pressure was  $9 \times 10^{-2}$  Pa, the bias voltage was 150 V, the sputtering temperature was 70 °C, the sputtering time was 6 min for Ti<sub>2</sub>O<sub>3</sub> film, respectively.
2. For the synthesis of Ti<sub>2</sub>O<sub>3</sub>/Cu based device, the deposition of Cu substrate and Ti<sub>2</sub>O<sub>3</sub> film on reaction tube was first using glow-discharge to clean glass tube, then depositing Cu layer by Cu target and Ti<sub>2</sub>O<sub>3</sub> film by Ti<sub>2</sub>O<sub>3</sub> target orderly, finally taking out the sample

after passive cooling. Specific parameters: the power was 5 KW, the sputtering pressure was  $9 \times 10^{-2}$  Pa, the bias voltage was 150 V, the sputtering temperature was 70 °C, the sputtering time for Cu layer,  $\text{Ti}_2\text{O}_3$  film was 12 min, 6 min, respectively. The followed glass vacuum layer was provided by Hebei scientist research experimental and equipment trade Co., Ltd. with  $1 \times 10^{-3}$  Pa of pressure.



**Table S1.** EXAFS fitting parameters of Ni SA/CeO<sub>2</sub> with NiO and Ni foil extracted from the Ni K-edge

| sample                 | Path  | CN      | $\sigma^2(10^{-3} \text{ \AA}^2)$ | R         | $\Delta E_0(\text{eV})$ |
|------------------------|-------|---------|-----------------------------------|-----------|-------------------------|
| Ni foil                | Ni-Ni | 12      | 5.9±0.4                           | 2.48±0.03 | 7.5                     |
| NiO                    | Ni-O  | 6       | 7.6±0.3                           | 1.88±0.02 | -3.9                    |
|                        | Ni-Ni | 12      | 7.2±1.0                           | 2.94±0.03 | -4.6                    |
| Ni SA/CeO <sub>2</sub> | Ni-O  | 8.0±1.0 | 3.9±1.1                           | 2.15±0.03 | -5.5                    |

The  $E_0$  value of Ni K-edge (the first inflection point on the edge) from Ni SA/CeO<sub>2</sub>, NiO, Ni foil was 8333 eV, 8334 eV, 8325 eV, respectively.

We took a comparative experiment of ESR driven by the electric furnace. When the hydrogen production rate was 40 L h<sup>-1</sup>, the input power of the electric furnace was 84 W.

The electric energy-hydrogen energy efficiency (ETH) of ESR was calculated as follows:

$$\text{ETH} = (\Delta H \cdot \varepsilon / 24.5) / (I \cdot 3600) \quad (5)$$

$\Delta H$  was the reaction enthalpy change of ethanol dehydrogenation ( $1/6 \text{ C}_2\text{H}_5\text{OH} (\text{l}) + 1/2 \text{ H}_2\text{O} (\text{l}) \rightarrow \text{H}_2 (\text{g}) + 1/3 \text{ CO}_2 (\text{g})$ ,  $\Delta H = 57.91 \text{ kJ mol}^{-1}$ ),  $\varepsilon$  (L) was the H<sub>2</sub> generation amount per hour (40 L h<sup>-1</sup>),  $I$  was the input power of the electric furnace (0.084 kW).

The ETH was calculated to be 31.2%.

According to the solar-electric energy efficiency of monocrystalline silicon solar cells at maximum 25%,<sup>8</sup> the STH according to the path of solar-electric energy-thermal energy-chemical energy was calculated as 25%\*31.2%=7.8%, far less than the our reported STH (16.7%) through the solar-thermal energy-chemical energy path.

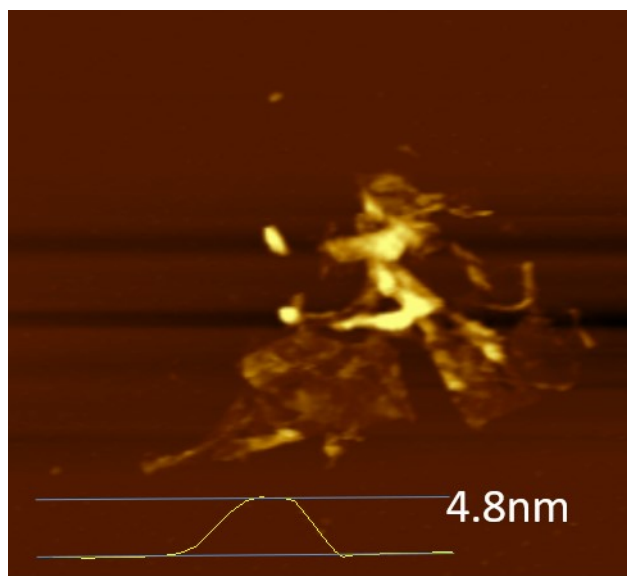

**Figure S1.** AFM image of Ni SA/CeO<sub>2</sub>.

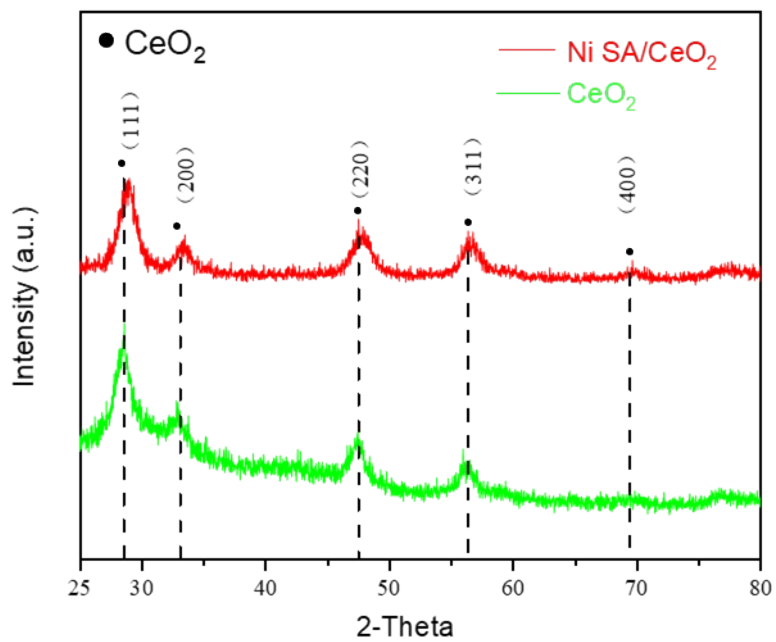

**Figure S2.** The XRD pattern of Ni SA/CeO<sub>2</sub> and CeO<sub>2</sub>.

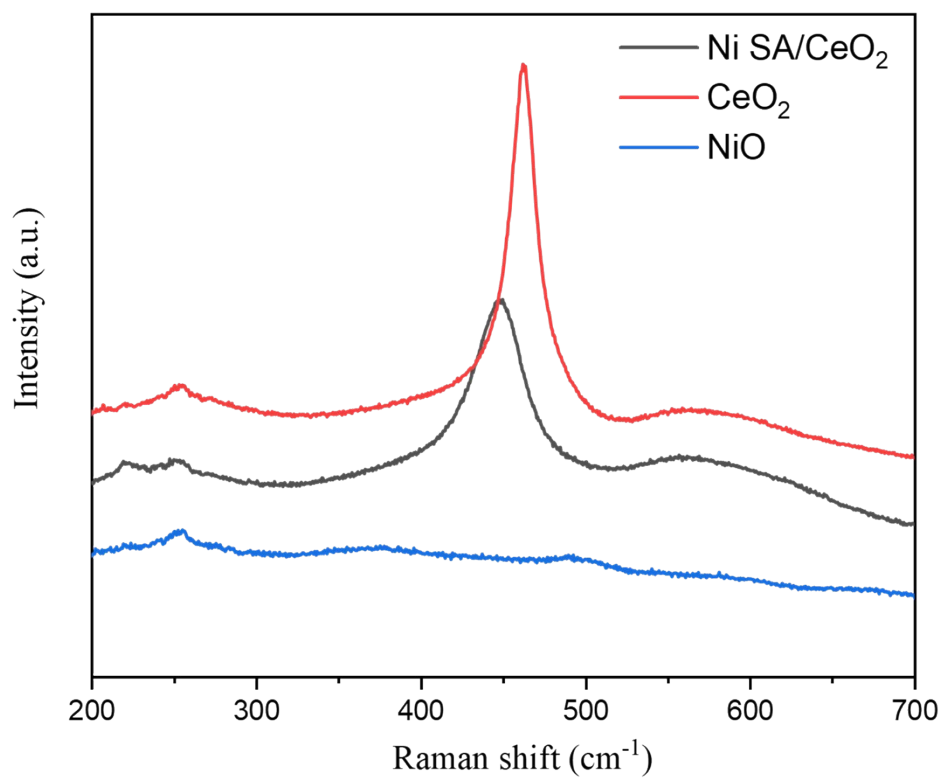

**Figure S3.** The Raman spectra of Ni SA/CeO<sub>2</sub>, NiO, CeO<sub>2</sub>.

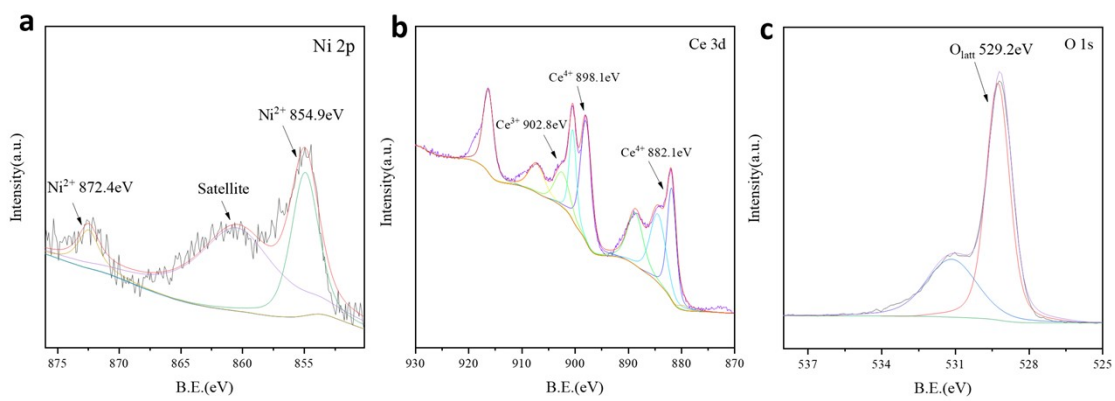

**Figure S4.** (a, b, c) Ni 2p, Ce 3d, O1s XPS spectra of Ni SA/CeO<sub>2</sub>.

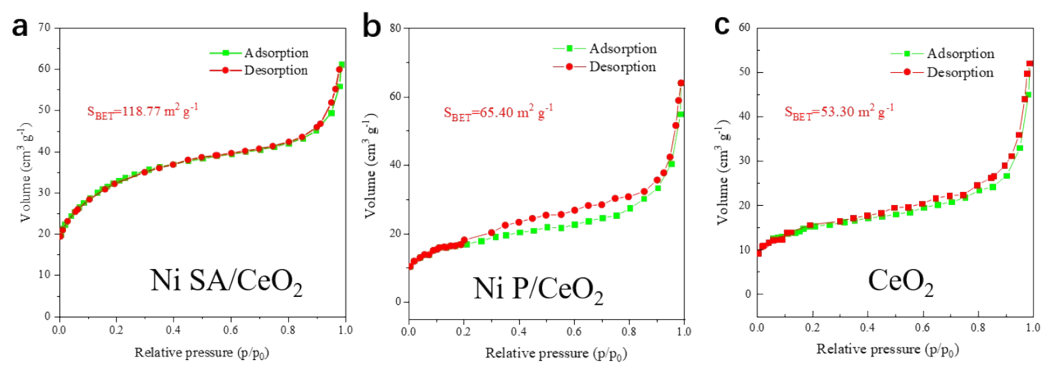

**Figure S5.** Nitrogen adsorption and desorption isotherms of the Ni SA/CeO<sub>2</sub> (a), Ni P/CeO<sub>2</sub> (b), CeO<sub>2</sub> (c).

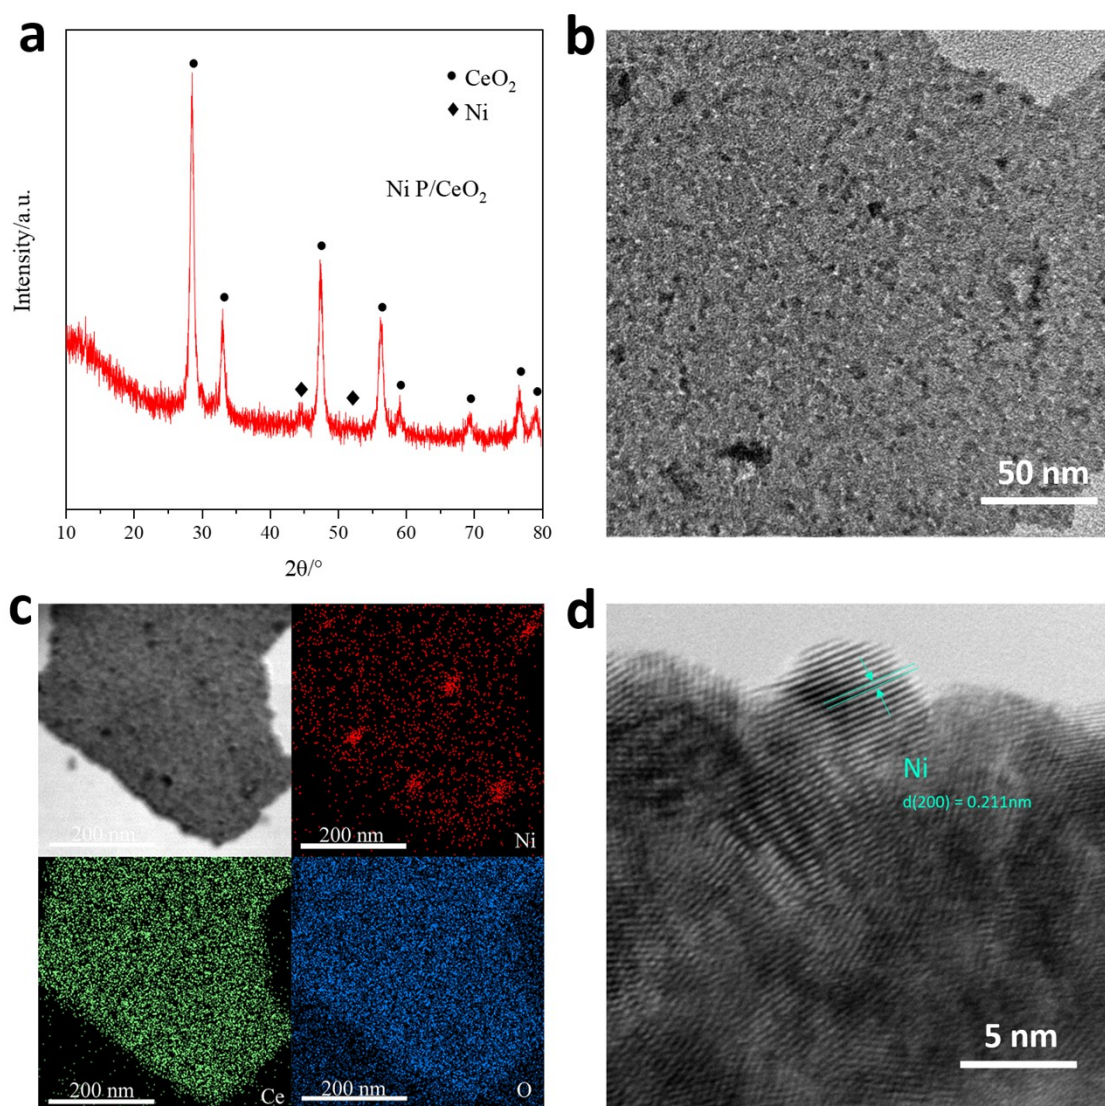

**Figure S6.** (a) XRD pattern, (b) TEM image, (c) STEM image and elemental mappings, (d) HRTEM image of the Ni P/CeO<sub>2</sub>.



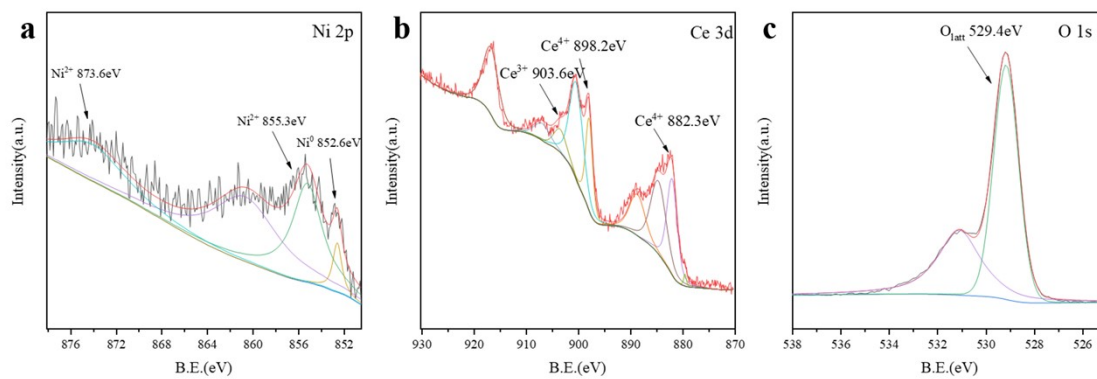

**Figure S7.** (a, b, c) Ni 2p, Ce 3d, O1s XPS spectra of Ni P/CeO<sub>2</sub>.

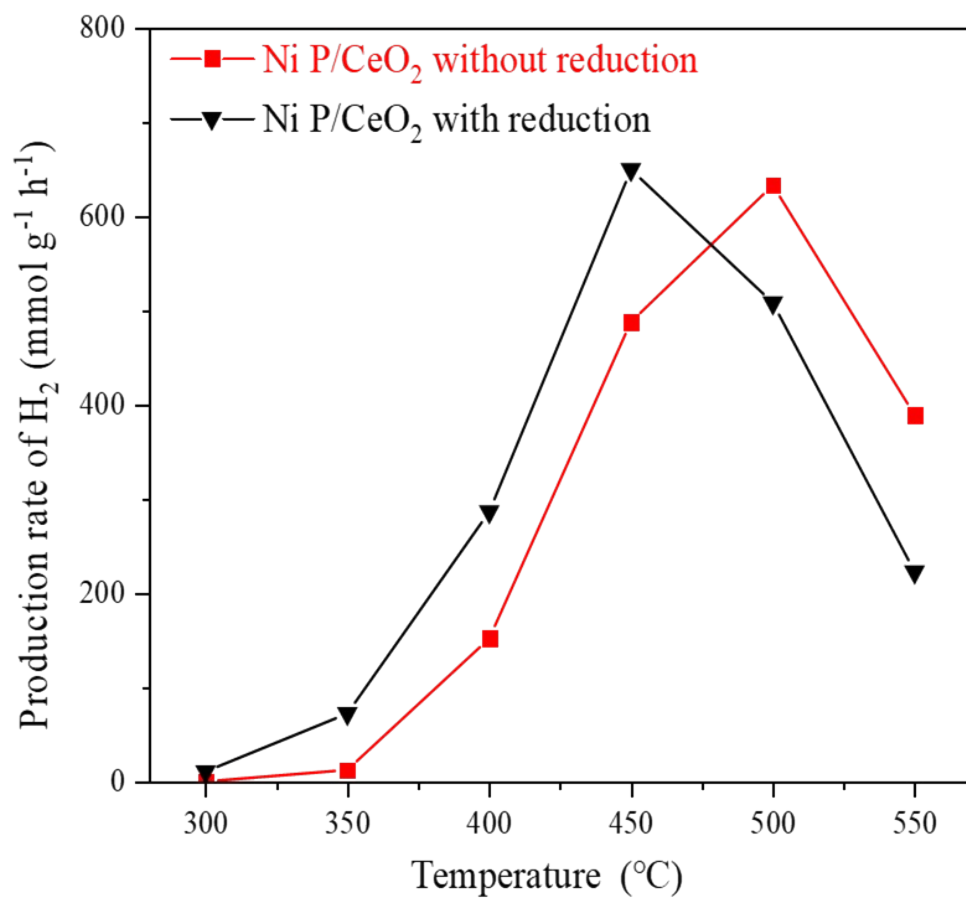

**Figure S8.** The hydrogen production rate of thermocatalytic ESR using the Ni P/CeO<sub>2</sub> with and without reduction process.

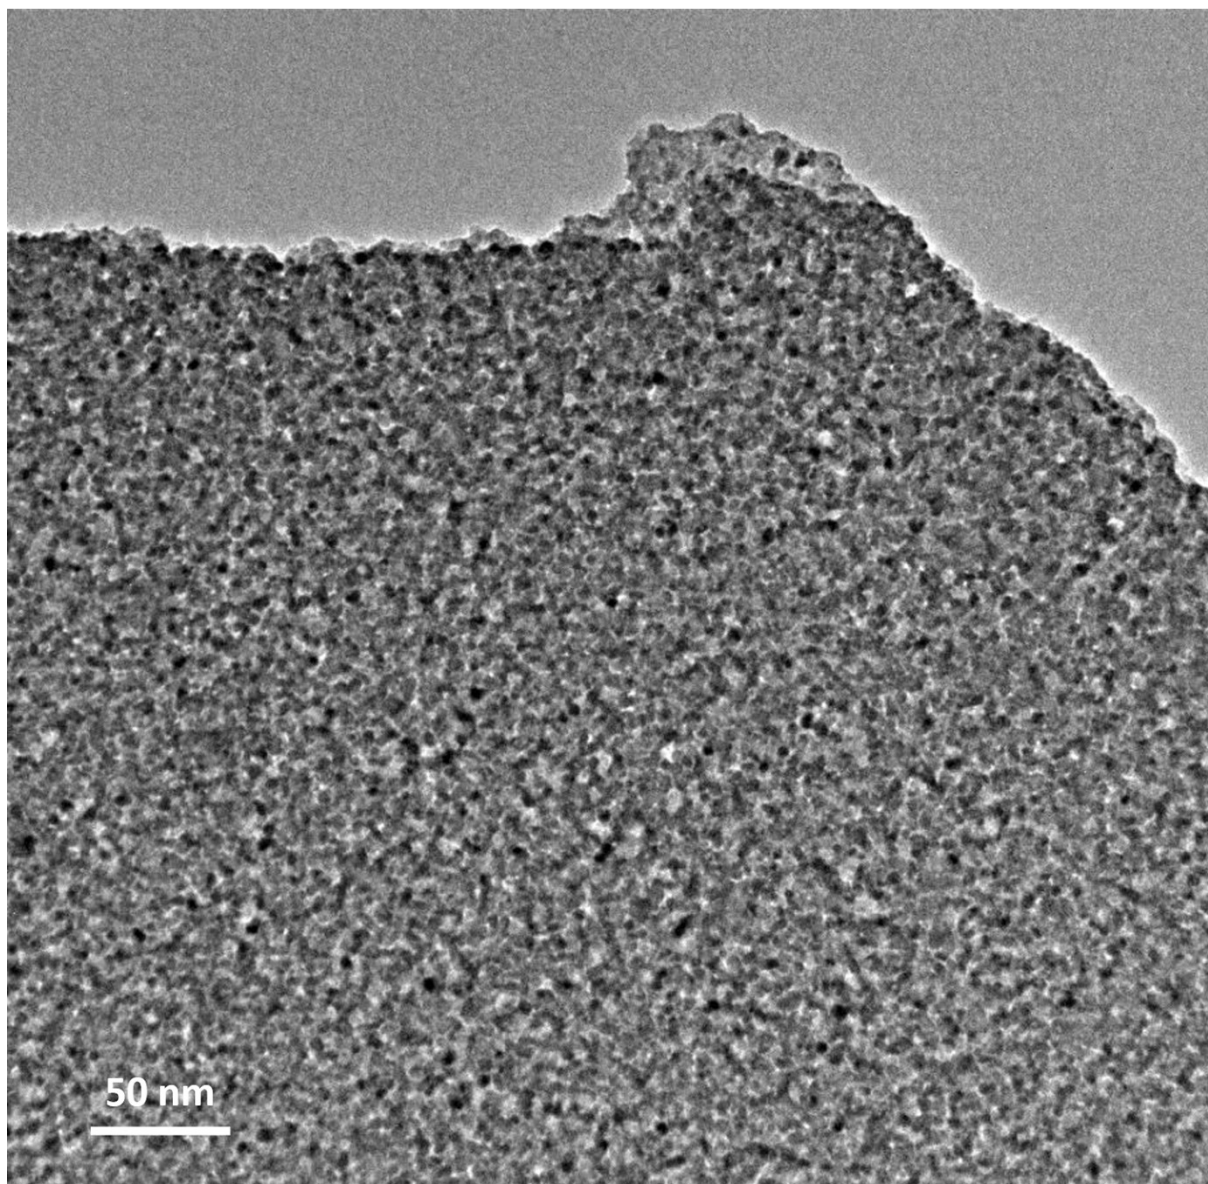

**Figure S9.** TEM image of the CeO<sub>2</sub>.

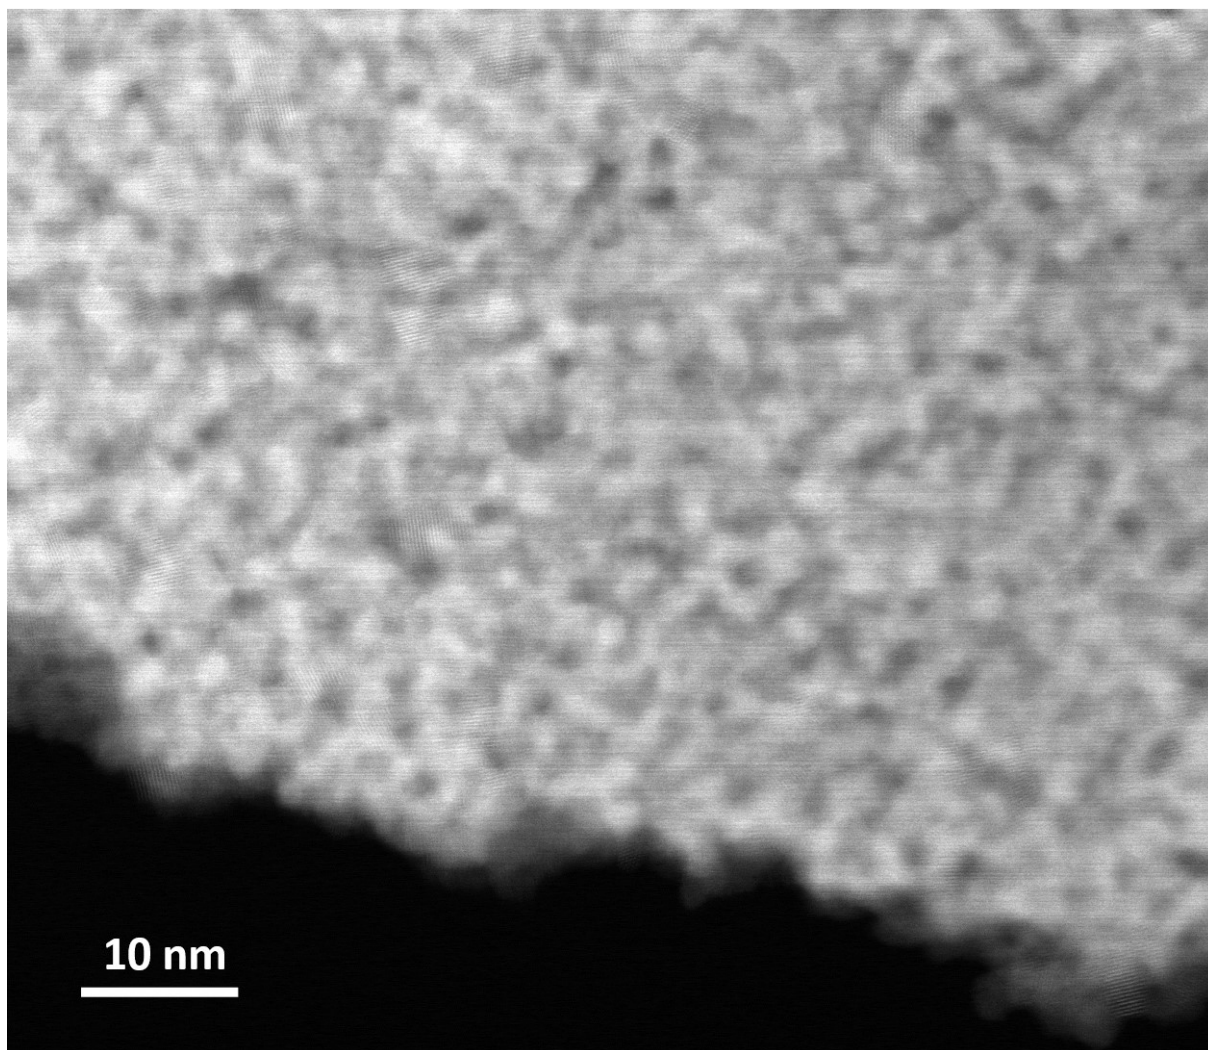

**Figure S10.** STEM image of Ni SA/CeO<sub>2</sub> after ESR stability test.

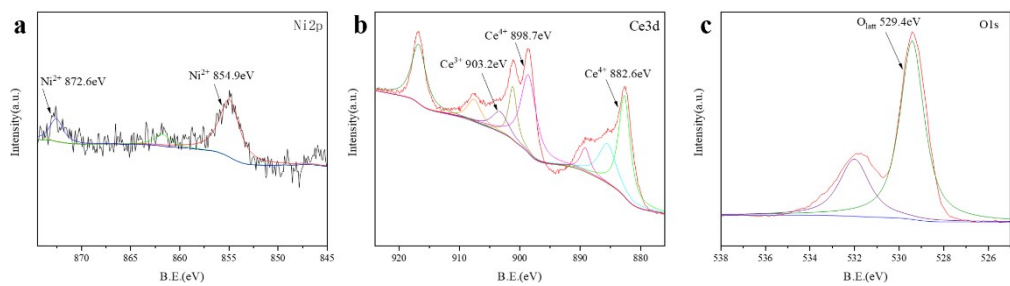

**Figure S11.** (a, b, c) Ni 2p, Ce 3d, O1s XPS spectra of Ni SA/CeO<sub>2</sub> after ESR stability test.

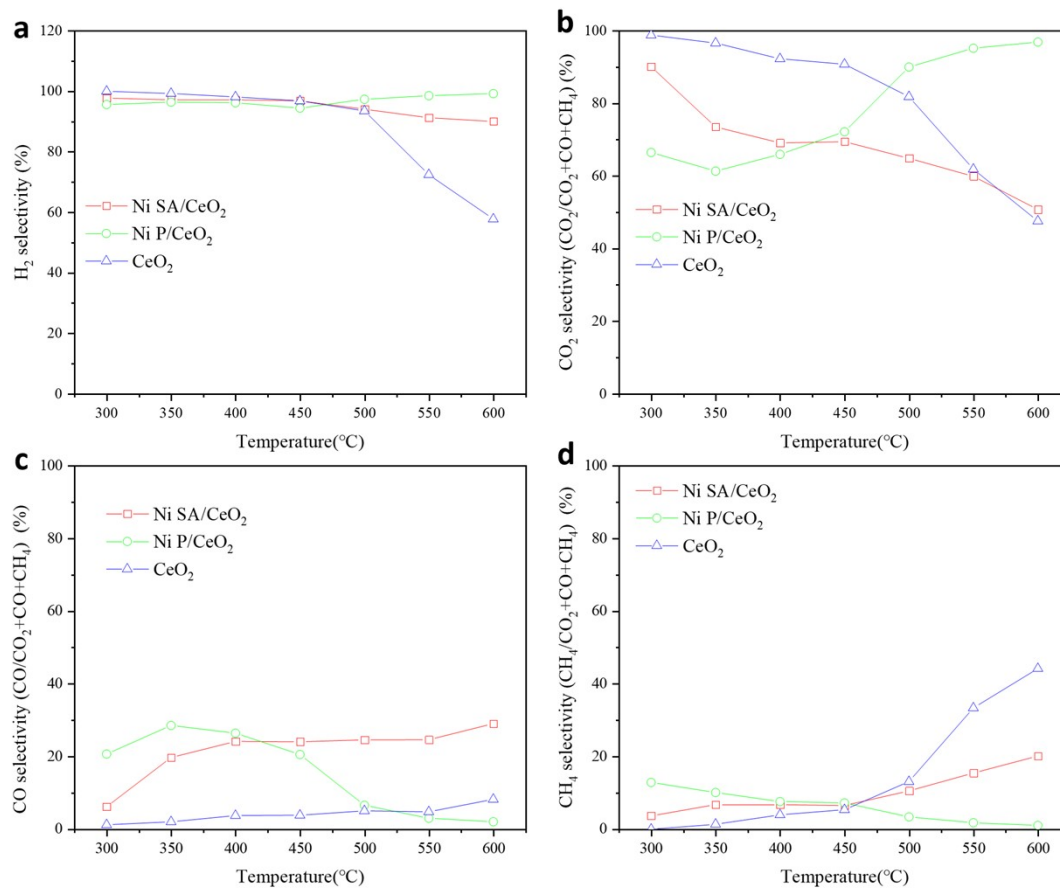

**Figure S12.** (a) H<sub>2</sub> selectivity of Ni SA/CeO<sub>2</sub>, Ni P/CeO<sub>2</sub>, CeO<sub>2</sub> as a function of temperature. (b) CO<sub>2</sub> selectivity of Ni SA/CeO<sub>2</sub>, Ni P/CeO<sub>2</sub>, CeO<sub>2</sub> as a function of temperature. (c) CO selectivity of Ni SA/CeO<sub>2</sub>, Ni P/CeO<sub>2</sub>, CeO<sub>2</sub> as a function of temperature. (d) CH<sub>4</sub> selectivity of Ni SA/CeO<sub>2</sub>, Ni P/CeO<sub>2</sub>, CeO<sub>2</sub> as a function of temperature.

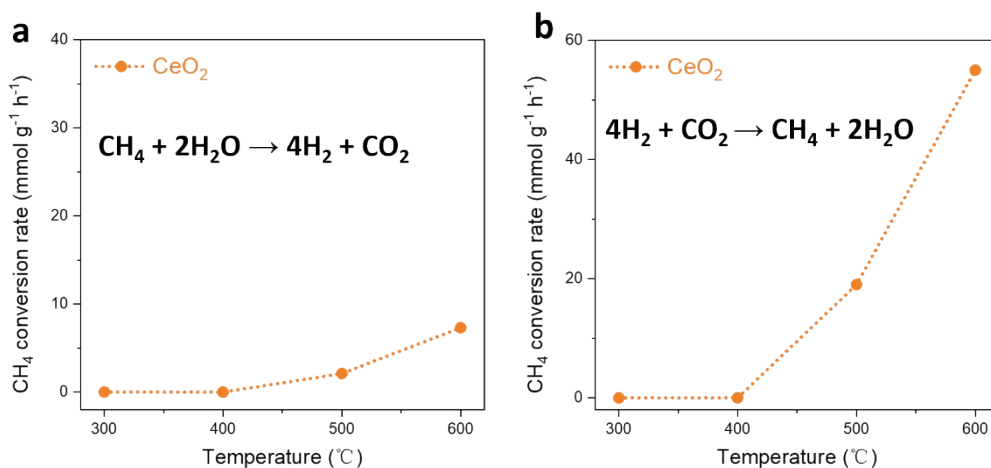

**Figure S13.** (a, b) The CH<sub>4</sub> steam reforming and CO<sub>2</sub> methanation performance over CeO<sub>2</sub>.

Through the experiments, we found that CeO<sub>2</sub> had a low activity for CH<sub>4</sub> reforming and a relative high activity for CO<sub>2</sub> methanation at high temperature (400-600 °C). It might be the main reason of relatively high CH<sub>4</sub> selectivity of CeO<sub>2</sub> at high temperature.

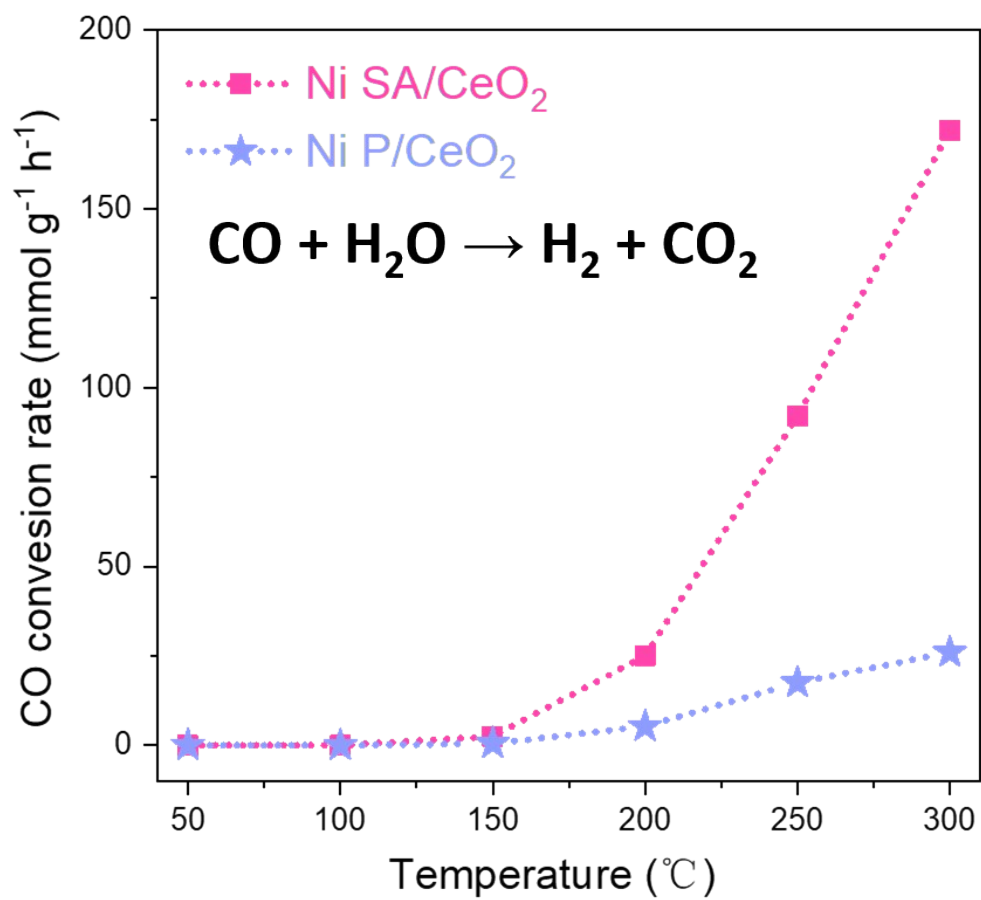

**Figure S14.** The CO steam reforming performance over Ni SA/CeO<sub>2</sub> and Ni P/CeO<sub>2</sub>.



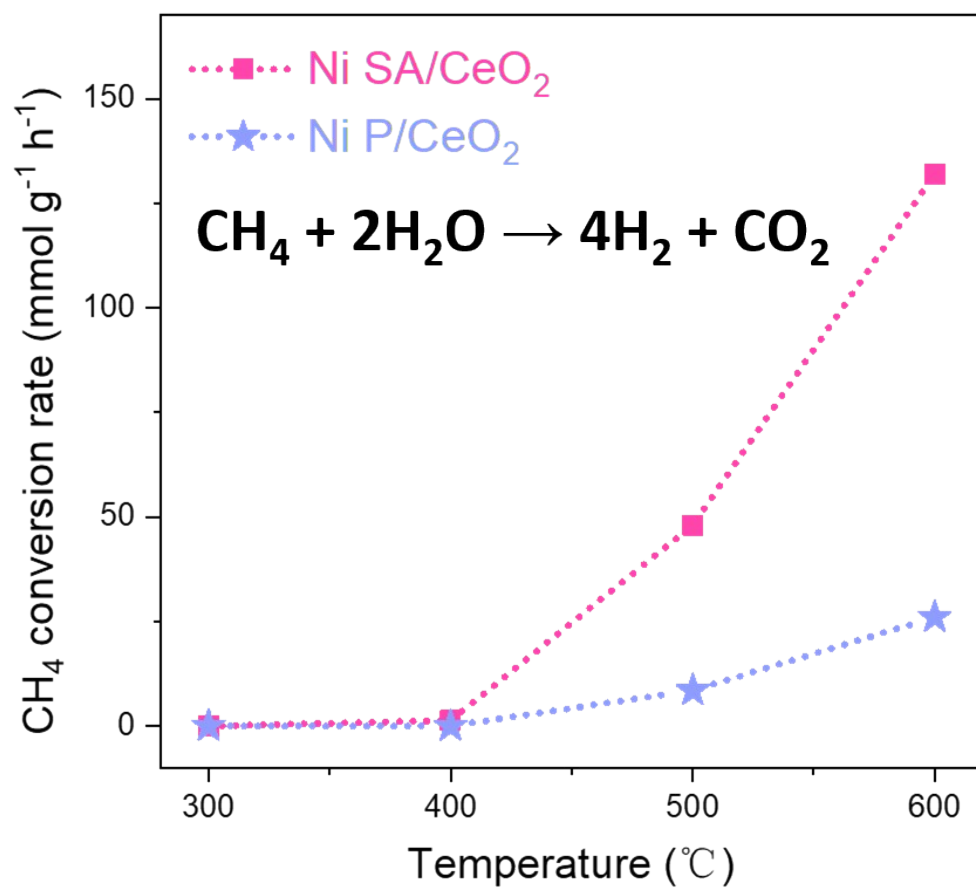

**Figure S15.** The CH<sub>4</sub> steam reforming performance over Ni SA/CeO<sub>2</sub> and Ni P/CeO<sub>2</sub>.

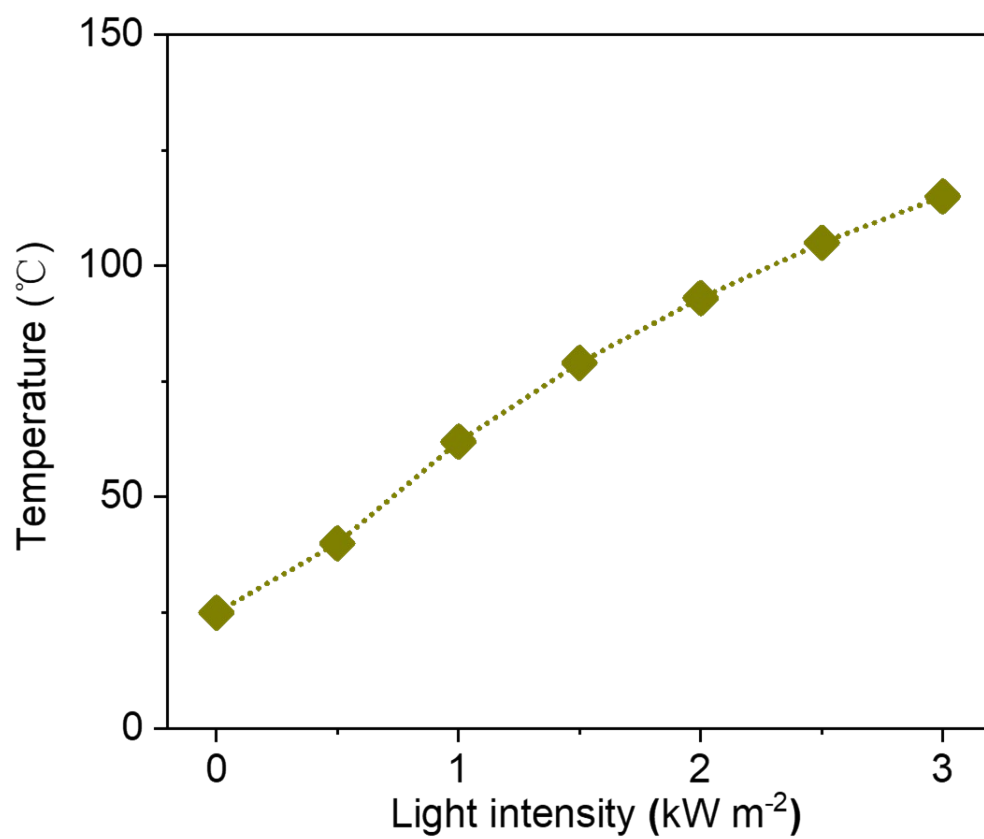

**Figure S16.** The temperature of Ni SA/CeO<sub>2</sub> direct under different intensities of solar irradiation.

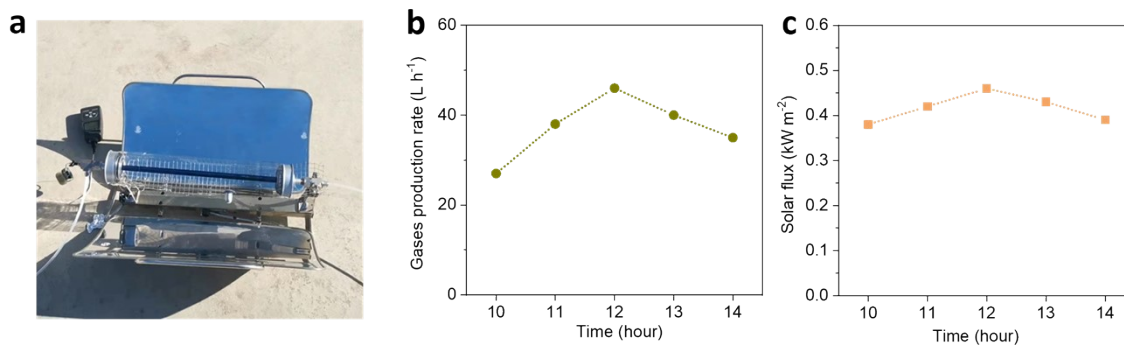

**Figure S17.** (a) Optical image of the outdoor solar-heating ESR system. (b, c) The ESR gases production rate and solar flux as a function of time under ambient sunlight irradiation on December 14, 2021, in the Baoding city, China.

## References

1. Y. Li, J. Hao, H. Song, F. Zhang, X. Bai, X. Meng, H. Zhang, S. Wang, Y. Hu and J. Ye, *Nature Communications*, 2019, **10**, 2359.
2. G. Kresse and J. Furthmüller, *Computational Materials Science*, 1996, **6**, 15-50.
3. G. Kresse and J. Furthmüller, *Physical Review B*, 1996, **54**, 11169-11186.
4. J. P. Perdew, K. Burke and M. Ernzerhof, *Physical Review Letters*, 1996, **77**, 3865-3868.
5. G. Kresse and D. Joubert, *Physical Review B*, 1999, **59**, 1758-1775.
6. P. E. Blöchl, *Physical Review B*, 1994, **50**, 17953-17979.
7. S. Grimme, J. Antony, S. Ehrlich and H. Krieg, *The Journal of Chemical Physics*, 2010, **132**, 154104.
8. O. S. Popel and A. B. Tarasenko, *Thermal Engineering*, 2021, **68**, 807-825.
